# Supplementary material for: Deciphering the microbiome shift during fermentation of medicinal plants
Source: PubMed Central journal article supplement (PMC6748931; doi:10.1038/s41598-019-49799-2), 2019-09-17
Supplement: 41598_2019_49799_MOESM1_ESM.pdf [file 41598_2019_49799_MOESM1_ESM.pdf]

## **Deciphering the microbiome shift during fermentation of medicinal plants**

Martina Köberl<sup>1,+</sup>, Sabine Erschen<sup>1,+</sup>, Mohammad Etemadi<sup>1</sup>, Richard Allen White III<sup>2,3</sup>,  
Tarek F. El-Arabi<sup>4,5</sup>, Gabriele Berg<sup>1</sup>

<sup>1</sup>*Graz University of Technology, Institute of Environmental Biotechnology, Graz, Austria*

<sup>2</sup>*Washington State University, Department of Crop and Soil Sciences, Pullman, WA, USA*

<sup>3</sup>*Washington State University, Department of Plant Pathology, Pullman, WA, USA*

<sup>4</sup>*Ain Shams University, Faculty of Agriculture, Cairo, Egypt*

<sup>5</sup>*Heliopolis University, Biotechnology Laboratory, Cairo, Egypt*

<sup>+</sup>these authors contributed equally to this work

**Table S1.** Observed species (OTUs) and Shannon diversity indices obtained at 97% sequence similarity for rarefied 16S rRNA gene sequence data of original and fermented medicinal plant samples.

| Sample <sup>a</sup> | OTUs | Shannon index |
|---------------------|------|---------------|
| Mc1-Ec              | 136  | 5.58          |
| Mc2-Ec              | 229  | 6.46          |
| Mc3-Ec              | 115  | 5.45          |
| Mc4-Ec              | 180  | 5.75          |
| Co1-Ec              | 241  | 6.69          |
| Co2-Ec              | 183  | 5.90          |
| Co3-Ec              | 208  | 6.31          |
| Co4-Ec              | 123  | 4.84          |
| Mc1-En              | 83   | 3.84          |
| Mc2-En              | 85   | 3.87          |
| Mc3-En              | 89   | 4.00          |
| Mc4-En              | 87   | 3.87          |
| Co1-En              | 86   | 4.04          |
| Co2-En              | 84   | 3.91          |
| Co3-En              | 89   | 4.17          |
| Co4-En              | 85   | 3.85          |
| Mc-W1               | 43   | 2.59          |
| Mc-W2               | 40   | 2.25          |
| Mc-W3               | 65   | 3.54          |
| Mc-W4               | 76   | 4.01          |
| Mc-W5               | 73   | 4.36          |
| Mc-W6               | 74   | 4.56          |
| Co-W1               | 50   | 3.34          |
| Co-W2               | 55   | 3.80          |
| Co-W3               | 68   | 4.10          |
| Co-W4               | 60   | 3.90          |
| Co-W5               | 62   | 4.11          |
| Co-W6               | 60   | 3.71          |

<sup>a</sup>Sample abbreviations indicate: (1) Mc = *Matricaria chamomilla*, Co = *Calendula officinalis*, (2) Ec = ectosphere, En = endosphere, W1-W6 = weeks of fermentation.
